# Supplementary material for: Germline TRAV5D-4 T-Cell Receptor Sequence Targets a Primary Insulin Peptide of NOD Mice
Source: PubMed Central journal article supplement — Diabetes. 2012 Mar 14;61(4):857–65. doi: 10.2337/db11-1113 (PMC3314349; doi:10.2337/db11-1113), 2012-03-14
Supplement: supp_db11-1113_DB111113SupplementaryData.pdf [file supp_db11-1113_DB111113SupplementaryData.pdf]

SUPPLEMENTARY DATA

**Supplementary Table 1.** CDR3 sequences used to produce  $\alpha$  chain retrogenic NOD mice (Sequences derived from NOD CD4 T cell clones)

|          | V $\alpha$<br>(TRAV) | N   | J $\alpha$<br>(TRAJ) | Original<br>Epitope | *Insulin<br>Autoantibodies |
|----------|----------------------|-----|----------------------|---------------------|----------------------------|
| 12-4.4   | 5D-4*04              |     | 53                   | B:9-23              | 100% (8/8)                 |
|          | AAS                  | A   | SGGSNYKLTF           |                     |                            |
| 12-4.1   | 5D-4*04              |     | 53                   | B:9-23              | 83% (5/6)                  |
|          | AAS                  | GAN | SGGSNYKLTF           |                     |                            |
| 8-1.1    | 5D-4*04              |     | 56                   | B:9-23              | 100% (5/5)                 |
|          | AAS                  | K   | TGGNNKLTF            |                     |                            |
| BDC-6.9  | 5D-4*01              |     | 9                    | Unknown<br>(Islets) | 50% (2/4)                  |
|          | AAS                  | AV  | GYKLTF               |                     |                            |
| NY4.1    | 5D-4*04              |     | 40                   | Unknown<br>(Islets) | 55% (5/9)                  |
|          | AAS                  | VR  | NYKYVF               |                     |                            |
| 14H4     | 5D-4*04              |     | 58                   | HEL:11-25           | 40% (2/5)                  |
|          | AAS                  | E   | QGTGSKLSF            |                     |                            |
| 5F2      | 5D-4*04              |     | 57                   | HEL:11-25           | 0% (0/5)                   |
|          | AAS                  | I   | QGGSAKLIF            |                     |                            |
| 2H6      | 21                   |     | 53                   | B:9-23              | 0% (0/7)                   |
|          | ILRV                 | D   | SGGSNYKLTF           |                     |                            |
| 12-2.35  | 7-4                  |     | 23                   | B:9-23              | 0% (0/7)                   |
|          | AA                   | IQ  | NYNQKLIF             |                     |                            |
| 12-1.19  | 13-1                 |     | 11                   | B:9-23              | 50% (4/8)                  |
|          | AME                  | RS  | SGYNKLTF             |                     |                            |
| BDC-10.1 | 17                   |     | 32                   | Chromogranin        | 0% (0/7)                   |
|          | ALE                  | GH  | YGGSGNKLIF           |                     |                            |
| BDC-2.5  | 7D-6                 |     | 22                   | Chromogranin        | 0% (0/7)                   |
|          | AAS                  | LA  | GSWQLIF              |                     |                            |
| 6C5      | 9D-4                 |     | 23                   | Unknown<br>(Islets) | 0% (0/4)                   |
|          | ALS                  | G   | NYNQKLIF             |                     |                            |

\*The frequency of mice that developed insulin autoantibodies.

SUPPLEMENTARY DATA

**Supplementary Table 2.** TCR  $\beta$  chains infiltrating pancreatic islets of TRAV5D-4  $\alpha$  chain retrogenic mice.

|                                       | <b>12-4.1</b> | <b>8-1.1</b> | <b>Total</b> |
|---------------------------------------|---------------|--------------|--------------|
| Number of mice tested                 | 4             | 5            | 9            |
| Number of sequences examined          | 64            | 82           | 146          |
| Number of unique sequences            | 44            | 47           | 90*          |
| <b>TRBV usage of unique sequences</b> |               |              |              |
| TRBV1                                 | 2 (5%)        | 0 (0)        | 2 (2%)       |
| TRBV2                                 | 0 (0)         | 1 (2%)       | 1 (1%)       |
| TRBV3                                 | 1 (2%)        | 9 (19%)      | 10 (11%)     |
| TRBV5                                 | 3 (7%)        | 9 (19%)      | 12 (13%)     |
| TRBV12-1                              | 0 (0)         | 1 (2%)       | 1 (1%)       |
| TRBV12-2                              | 3 (7%)        | 1 (2%)       | 4 (4%)       |
| TRBV13-1                              | 2 (5%)        | 2 (4%)       | 4 (4%)       |
| TRBV13-2                              | 6 (14%)       | 8 (17%)      | 14 (16%)     |
| TRBV13-3                              | 2 (5%)        | 3 (6%)       | 5 (6%)       |
| TRBV14                                | 0 (0%)        | 1 (2%)       | 1 (1%)       |
| TRBV15                                | 10 (23%)      | 4 (9%)       | 14 (16%)     |
| TRBV16                                | 5 (11%)       | 3 (6%)       | 8 (9%)       |
| TRBV17                                | 1 (2%)        | 0 (0)        | 1 (1%)       |
| TRBV20                                | 2 (5%)        | 0 (0)        | 2 (2%)       |
| TRBV23                                | 2 (5%)        | 0 (0)        | 2 (2%)       |
| TRBV26                                | 3 (7%)        | 1 (2%)       | 4 (4%)       |
| TRBV29                                | 0 (0)         | 1 (2%)       | 1 (1%)       |
| TRBV30                                | 1 (2%)        | 0 (0)        | 1 (1%)       |
| TRBV31                                | 1 (2%)        | 3 (6%)       | 4 (4%)       |
| <b>TRBJ usage of unique sequences</b> |               |              |              |
| TRBJ1-1                               | 6 (14%)       | 5 (11%)      | 11 (12%)     |
| TRBJ1-2                               | 1 (2%)        | 3 (6%)       | 4 (4%)       |
| TRBJ1-3                               | 1 (2%)        | 3 (6%)       | 4 (4%)       |
| TRBJ1-4                               | 7 (16%)       | 5 (11%)      | 12 (13%)     |
| TRBJ1-5                               | 2 (5%)        | 0            | 2 (2%)       |
| TRBJ1-6                               | 3 (7%)        | 3 (6%)       | 6 (7%)       |
| TRBJ2-1                               | 5 (11%)       | 5 (11%)      | 10 (11%)     |
| TRBJ2-2                               | 2 (5%)        | 1 (2%)       | 3 (3%)       |
| TRBJ2-3                               | 2 (5%)        | 3 (6%)       | 5 (6%)       |
| TRBJ2-4                               | 3 (7%)        | 4 (9%)       | 7 (8%)       |
| TRBJ2-5                               | 7 (16%)       | 5 (11%)      | 12 (13%)     |
| TRBJ2-7                               | 5 (11%)       | 10 (21%)     | 15 (17%)     |

\* One unique sequence is detected in both 12-4.1 and 8-1.1  $\alpha$  chain retrogenic mice.

SUPPLEMENTARY DATA

**Supplementary Table 3.** CDR3 sequences used to produce  $\alpha$  chain retrogenic NOD mice (Sequences detected in NOD islets by 454 sequencing).

|                      |             | V $\alpha$<br>(TRAV) | N        | J $\alpha$<br>(TRAJ) | *Insulin<br>Autoantibodies |
|----------------------|-------------|----------------------|----------|----------------------|----------------------------|
| <b>TRAV<br/>5D-4</b> | Frequent 1  | 5D-4*04              |          | 56                   | 100% (6/6)                 |
|                      |             | AAS                  | T        | TGGNNKLTF            |                            |
|                      | Frequent 2  | 5D-4*04              |          | 40                   | 60% (3/5)                  |
|                      |             | AAS                  | GTG      | NYKYVF               |                            |
|                      | Singleton 1 | 5D-4*04              |          | 53                   | 50% (2/4)                  |
|                      |             | AA                   | V        | SGGSNYKLTF           |                            |
|                      | Singleton 2 | 5D-4*04              |          | 56                   | 20% (1/5)                  |
|                      |             | AAS                  | QA       | TGGNNKLTF            |                            |
|                      | Singleton 3 | 5D-4*04              |          | 56                   | 0% (0/3)                   |
| AA                   |             | N                    | GGNNKLTF |                      |                            |
| <b>TRAV<br/>6</b>    | Frequent 1  | 6D-4                 |          | 38                   | 0% (0/4)                   |
|                      |             | ALV                  | P        | NVGDNSKLIW           |                            |
|                      | Frequent 2  | 6-1                  |          | 22                   | 0% (0/5)                   |
|                      |             | VL                   | GDRP     | SGSWQLIF             |                            |
|                      | Frequent 3  | 6-5                  |          | 49                   | 0% (0/3)                   |
|                      |             | AL                   | HTG      | TGYQNFYF             |                            |
| <b>TRAV<br/>13-1</b> | Frequent 1  | 13-1                 |          | 44                   | 0% (0/3)                   |
|                      |             | AME                  | RG       | TGSGGKLTL            |                            |
|                      | Frequent 2  | 13-1                 |          | 18                   | 0% (0/3)                   |
|                      |             | A                    | -        | RGSALGRLHF           |                            |
|                      | Frequent 3  | 13-1                 |          | 17                   | 0% (0/3)                   |
|                      |             | AM                   | K        | SAGNKLTF             |                            |

\*The frequency of mice that developed insulin autoantibodies.

SUPPLEMENTARY DATA

**Supplementary Figure 1.** Development of diabetes in  $\alpha$  chain retrogenic NOD mice. NOD mice retrogenic for  $\alpha$  chains with TRAV5D-4 (panel A: 12-4.4 (n=8), 12-4.1 (n=6), 8-1.1 (n=5), BDC-6.9 (n=6), NY4.1 (n=9), 14H4 (n=5), 5F2 (n=5)) and with non-TRAV5D-4 (panel B: 2H6 (n=7), 12-2.35 (n=7), 12-1.19 (n=8), BDC-10.1 (n=7), BDC-2.5 (n=7), 6C5 (n=4)) were tested for blood glucose levels weekly.

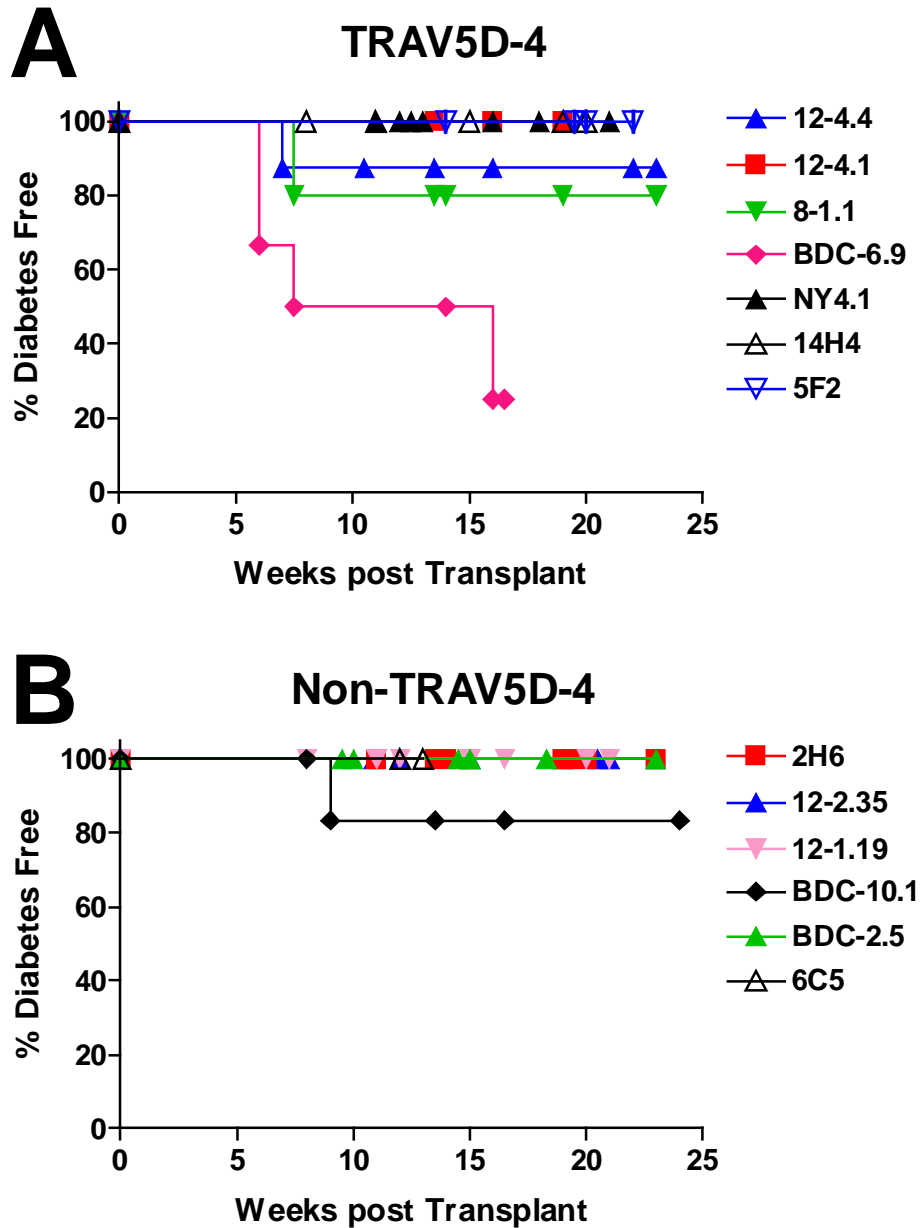

SUPPLEMENTARY DATA

**Supplementary Figure 2.** CD4 and CD8 T cells in the peripheral blood in  $\alpha$  chain retrogenic NOD mice.

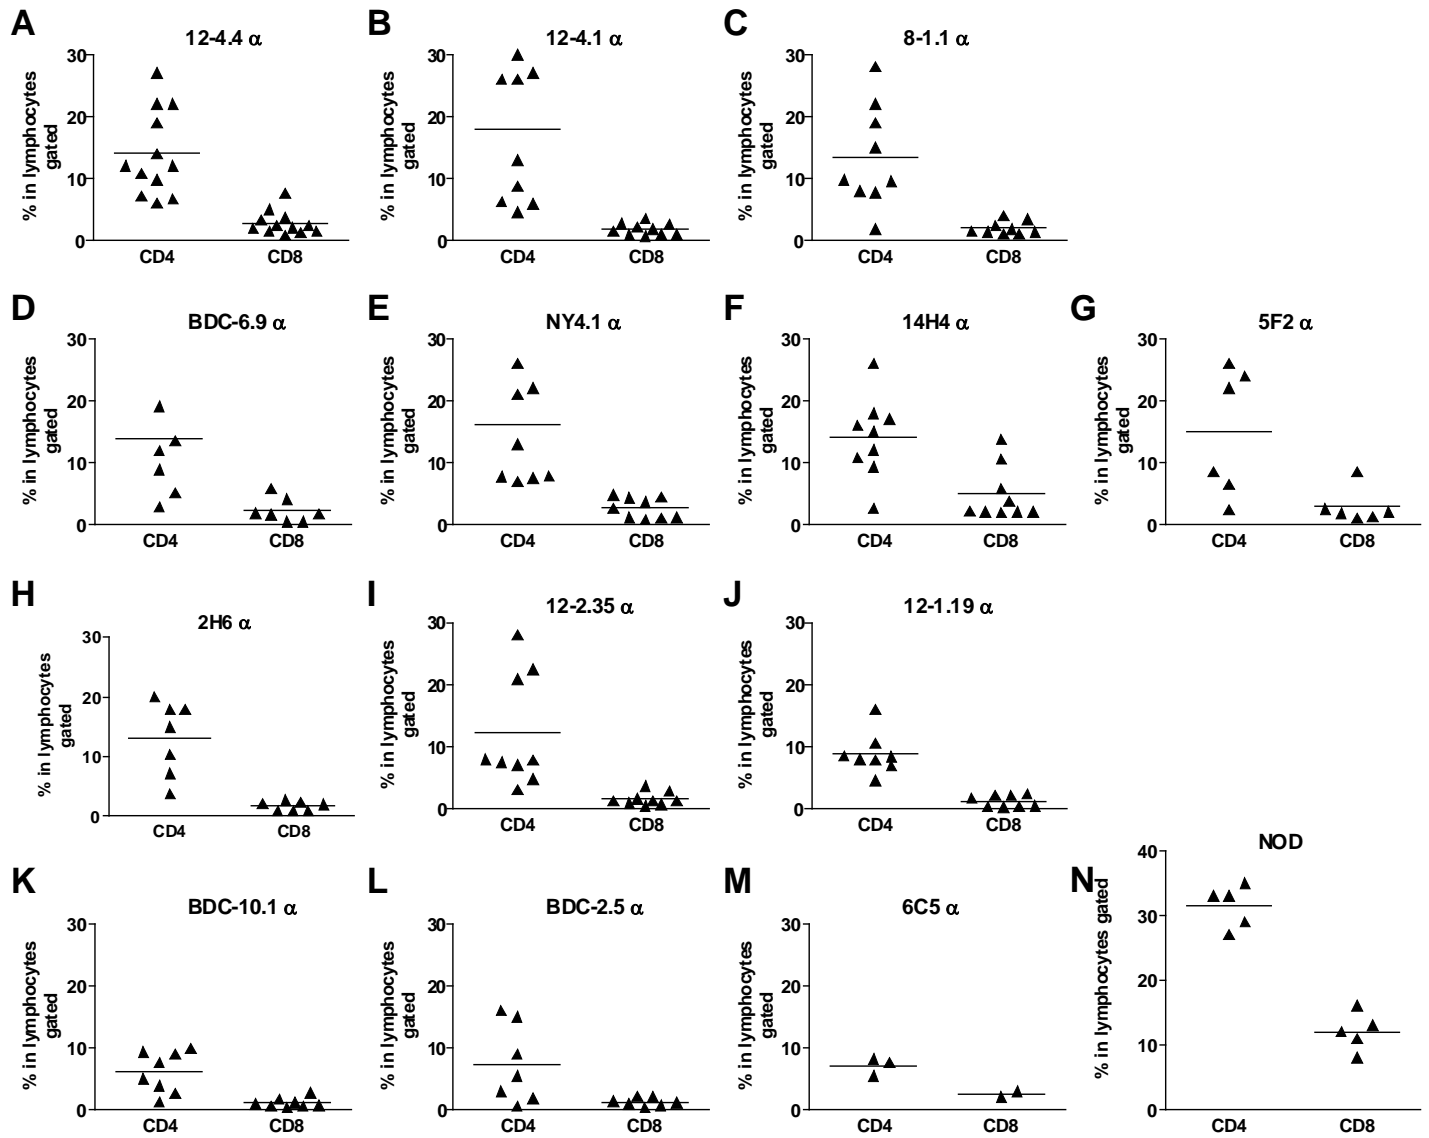

SUPPLEMENTARY DATA

**Supplementary Figure 3.** Comparison of *V $\alpha$*  amino acid sequences of mouse TRAV5D-4 and human TRAV13-1.

Amino acid sequences of orthologous *V $\alpha$*  genes (mouse TRAV5D-4 and human TRAV13-1) are aligned. The CDR regions are designated by blue, and differences are highlighted by red.

**CDR1**

|                   |                                             |                 |
|-------------------|---------------------------------------------|-----------------|
| <b>MOUSE 5D-4</b> | GEQVEQLPSILRVQEGSSASINCSYE                  | DSAS <b>N</b> Y |
| <b>HUMAN 13-1</b> | GENVEQ <b>HPSTLSVQEG</b> DSAV <b>IKCTYS</b> | DSAS <b>N</b> Y |

**CDR2**

|                   |                            |                         |
|-------------------|----------------------------|-------------------------|
| <b>MOUSE 5D-4</b> | FPWYKQEPGENPKLIID          | I <b>R</b> SNME         |
| <b>HUMAN 13-1</b> | FPWYKQ <b>ELGKGPQ</b> LIID | I <b>R</b> SN <b>VG</b> |

**CDR3**

|                   |                          |                             |     |
|-------------------|--------------------------|-----------------------------|-----|
| <b>MOUSE 5D-4</b> | RKQTQGLIVLLDKKAKRFS      | LHITDTQPGDSAMYFC            | AAS |
| <b>HUMAN 13-1</b> | <b>EKKDQRIAVTLNKTAKH</b> | FSLHIT <b>ETQPE</b> DSAVYFC | AAS |
